# Supplementary material for: Effect of ammonium on liquid- and gas-phase protonation and deprotonation in electrospray ionization mass spectrometry
Source: Royal Society of Chemistry journal article supplement (doi:10.1039/c2an36022e), 2012-11-26
Supplement: c2an36022e.pdf [file c2an36022e.pdf]

## SUPPLEMENTARY INFORMATION

# Effect of ammonium on liquid- and gas-phase protonation and deprotonation in electrospray ionization mass spectrometry

X. Jin Yang,<sup>\*a</sup> Yixin Qu,<sup>a</sup> Qipeng Yuan,<sup>a</sup> Pingyu Wan,<sup>a</sup> Zhengxia Du,<sup>a</sup> Dazhou Chen,<sup>b</sup> and Choon Wong<sup>c</sup>

<sup>a</sup> Beijing University of Chemical Technology, Beijing, China; <sup>b</sup> China National Institute of Metrology, Beijing, China; <sup>c</sup> Division of Analytical Laboratories, New South Wales Department of Health, Sydney, Australia. E-mail: [yangxj@mail.buct.edu.cn](mailto:yangxj@mail.buct.edu.cn). Fax/Tel: +86-10-64421030.

Table S1. Molecular formula, structure and CAS number of compounds investigated

| Category of compounds                                                                   | Compound name<br>Molecular formula<br>Molecular weight<br>pK <sub>a</sub><br>CAS number                   | Molecular structure                                                                                     |
|-----------------------------------------------------------------------------------------|-----------------------------------------------------------------------------------------------------------|---------------------------------------------------------------------------------------------------------|
| Phenoxy acids                                                                           | 2,4-D<br>C <sub>8</sub> H <sub>6</sub> Cl <sub>2</sub> O <sub>3</sub><br>221.04<br>2.64<br>94-75-7        |                                                                                                         |
|                                                                                         | DB, 2, 4-DB<br>C <sub>10</sub> H <sub>10</sub> Cl <sub>2</sub> O <sub>3</sub><br>249.09<br>4.8<br>94-82-6 |                                                                                                         |
|                                                                                         | Dichlorprop<br>C <sub>9</sub> H <sub>8</sub> Cl <sub>2</sub> O <sub>3</sub><br>235.07<br>3.00<br>120-36-5 |                                                                                                         |
|                                                                                         | MCPA<br>C <sub>9</sub> H <sub>9</sub> ClO <sub>3</sub><br>200.62<br>3.07<br>94-74-6                       |                                                                                                         |
|                                                                                         | Mecoprop<br>C <sub>10</sub> H <sub>11</sub> ClO <sub>3</sub><br>214.65<br>3.78<br>7085-19-0               |                                                                                                         |
|                                                                                         | Carbamates                                                                                                | Aldicarb<br>C <sub>7</sub> H <sub>14</sub> N <sub>2</sub> O <sub>2</sub> S<br>190.26<br>-NA<br>116-06-3 |
| Carbaryl<br>C <sub>12</sub> H <sub>11</sub> NO <sub>2</sub><br>201.22<br>-NA<br>63-25-2 |                                                                                                           |                                                                                                         |

|                 |                                                                                                       |                                                                                      |
|-----------------|-------------------------------------------------------------------------------------------------------|--------------------------------------------------------------------------------------|
|                 | <p>Carbendazim<br/> <math>C_9H_9N_3O_2</math><br/> 191.19<br/> 4.2<br/> 10605-21-7</p>                | 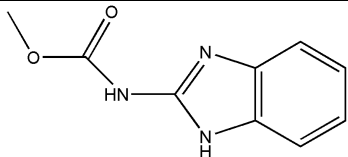   |
|                 | <p>Carbofuran<br/> <math>C_{12}H_{15}NO_3</math><br/> 221.26<br/> - NA<br/> 1563-66-2</p>             |    |
| Imidazole       | <p>Prochloraz<br/> <math>C_{15}H_{16}Cl_3N_3O_2</math><br/> 376.67<br/> 3.8<br/> 67747-09-5</p>       |    |
| Organophosphate | <p>Dimethoate<br/> <math>C_5H_{12}NO_3PS_2</math><br/> 229.25<br/> 2.0 (20°C)<br/> 60-51-5</p>        |    |
|                 | <p>Pirimiphos-ethyl<br/> <math>C_{13}H_{24}N_3O_3PS</math><br/> 333.38<br/> 4.30<br/> 23505-41-1</p>  |   |
| Thiocarbamate   | <p>Molinate (Liquid)<br/> <math>C_9H_{17}NOS</math><br/> 187.30<br/> -NA<br/> 2212-67-1</p>           |  |
| Sulfonylurea    | <p>Bensulfuron methyl<br/> <math>C_{16}H_{18}N_4O_7S</math><br/> 410.40<br/> 5.2<br/> 83055-99-6</p>  |  |
|                 | <p>Chlorsulfuron<br/> <math>C_{12}H_{12}ClN_5O_4S</math><br/> 357.77<br/> 3.60<br/> 64902-72-3</p>    |  |
|                 | <p>Metsulfuron methyl<br/> <math>C_{14}H_{15}N_5O_6S</math><br/> 381.36<br/> 3.33<br/> 74223-64-6</p> |  |

|           |                                                                                                                                |                                                                                      |
|-----------|--------------------------------------------------------------------------------------------------------------------------------|--------------------------------------------------------------------------------------|
|           | <p>Rimsulfuron<br/> <math>C_{14}H_{17}N_5O_7S_2</math><br/> 431.44<br/> 4<br/> 122931-48-0</p>                                 | 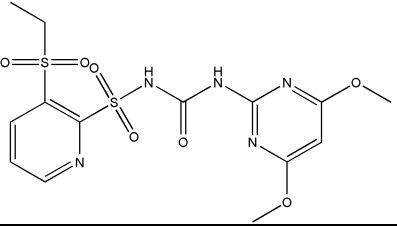   |
|           | <p>Sulfometuron methyl<br/> <math>C_{15}H_{16}N_4O_5S</math><br/> 364.38<br/> 5.2<br/> 74222-97-2</p>                          |    |
|           | <p>Thifensulfuron-methyl<br/> (Pinnacle)<br/> <math>C_{12}H_{13}N_5O_6S_2</math><br/> 387.40<br/> 4 (25°C)<br/> 79277-27-3</p> |    |
|           | <p>Triasulfuron<br/> <math>C_{14}H_{16}ClN_5O_5S</math><br/> 401.82<br/> 4.64 (20°C)<br/> 82097-50-5</p>                       |   |
|           | <p>Tribenuron-methyl<br/> <math>C_{15}H_{17}N_5O_6S</math><br/> 395.39<br/> 4.7<br/> 101200-48-0</p>                           |  |
| Triazines | <p>Ametryn<br/> <math>C_9H_{17}N_5S</math><br/> 227.33<br/> 4.1(20°C)<br/> 834-12-8</p>                                        |  |
|           | <p>Atrazine<br/> <math>C_8H_{14}ClN_5</math><br/> 215.69<br/> 1.7<br/> 1912-24-9</p>                                           |  |
|           | <p>Cyanazine<br/> <math>C_9H_{13}ClN_6</math><br/> 240.69<br/> 0.63<br/> 21725-46-2</p>                                        |  |

|                  |                                                                                                    |                                                                                      |
|------------------|----------------------------------------------------------------------------------------------------|--------------------------------------------------------------------------------------|
|                  | <p>Prometryn<br/> <math>C_{10}H_{19}N_5S</math><br/> 241.40<br/> 4.1<br/> 7287-19-6</p>            | 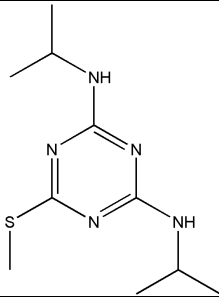   |
|                  | <p>Simazine<br/> <math>C_7H_{12}ClN_5</math><br/> 201.70<br/> 1.62 (20°C)<br/> 122-34-9</p>        |    |
|                  | <p>Terbutryn<br/> <math>C_{10}H_{19}N_5S</math><br/> 241.40<br/> 4.3<br/> 886-50-0</p>             |    |
| Substituted urea | <p>Diuron<br/> <math>C_9H_{10}Cl_2N_2O</math><br/> 233.10<br/> -NA<br/> 330-54-1</p>               |   |
|                  | <p>Fenuron<br/> <math>C_9H_{12}N_2O</math><br/> 164.21<br/> -NA<br/> 101-42-8</p>                  |  |
|                  | <p>Fluometuron<br/> <math>C_{10}H_{11}F_3N_2O</math><br/> 232.20<br/> -NA<br/> 2164-17-2</p>       |  |
|                  | <p>Linuron<br/> <math>C_9H_{10}Cl_2N_2O_2</math><br/> 249.10<br/> -NA<br/> 330-55-2</p>            |  |
|                  | <p>Methabenzthiazuron<br/> <math>C_{10}H_{11}N_3OS</math><br/> 221.28<br/> -NA<br/> 18691-97-9</p> |  |
|                  | <p>Monuron<br/> <math>C_9H_{11}ClN_2O</math><br/> 198.65<br/> -NA<br/> 150-68-5</p>                |  |

|                   |                                                                                                                             |                                                                                      |
|-------------------|-----------------------------------------------------------------------------------------------------------------------------|--------------------------------------------------------------------------------------|
|                   | <p>Neburon<br/> <math>C_{12}H_{16}Cl_2N_2O</math><br/> 275.18<br/> -NA<br/> 555-37-3</p>                                    | 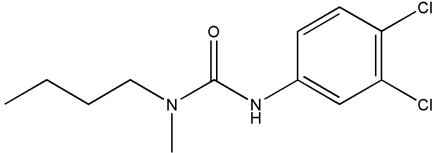   |
|                   | <p>Siduron<br/> <math>C_{14}H_{20}N_2O</math><br/> 232.32<br/> -NA<br/> 1982-49-6</p>                                       |    |
| Substitued amide  | <p>Propyzamide<br/> <math>C_{12}H_{11}Cl_2NO</math><br/> 256.13<br/> -NA<br/> 23950-58-5</p>                                |    |
| Benzothiadiazole  | <p>Bentazone<br/> <math>C_{10}H_{12}N_2O_3S</math><br/> 240.28<br/> 3.3 (24°C)<br/> 25057-89-0</p>                          |    |
| Chloroacetanilide | <p>Metolachlor<br/> <math>C_{15}H_{22}ClNO_2</math><br/> 283.80<br/> -NA<br/> 51218-45-2</p>                                |   |
| Caffeine          | <p>Caffeine<br/> <math>C_8H_{10}N_4O_2</math><br/> 194.19<br/> 10.4 (40 °C)<br/> 58-08-2</p>                                |  |
| Isoflavones       | <p>Daidzein<br/> <math>C_{15}H_{10}O_4</math><br/> 254.24<br/> pK<sub>a1</sub> 7.77, pK<sub>a2</sub> 9.74<br/> 486-66-8</p> |  |

**Table S2** Comparison of intensity of Na adduct  $[M+Na]^+$  and protonated ions ( $[M+H]^+$ ) in methanol mobile phases containing additives (A) 1 mM formic acid-0.4 mM ammonia (pH 3.7) and (B) 1 mM formic acid (pH 3.5). For experimental condition, see Experimental Section of the text.

| Ion mode | Compound            | pK <sub>a</sub> | Retention time (min) |           | $[M+Na]^+$ (A) | $[M+Na]^+$ (B) | $[M+Na]^+$ (A) | $[M+H]^+$ (A) |      |
|----------|---------------------|-----------------|----------------------|-----------|----------------|----------------|----------------|---------------|------|
|          |                     |                 | (A) pH3.7            | (B) pH3.5 | $[M+H]^+$ (A)  | $[M+H]^+$ (B)  | $[M+Na]^+$ (B) | $[M+H]^+$ (B) |      |
| ESI+     | Dimethoate          | 2.00            | 15.74                | 15.68     | 0.36           | 11.9           | 0.2            | 5.05          |      |
|          | Aldicarb            |                 | 20.92                | 20.92     | 0.23           | 2.2            | 0.2            | 1.94          |      |
|          | Cyanazine           |                 | 24.36                | 24.24     | 0.21           | 0.3            | 0.8            | 1.25          |      |
|          | Monuron             |                 | 25.02                | 24.96     | 0.04           | 0.9            | 0.2            | 3.47          |      |
|          | Thifensulfuron      | 4.00            | 25.51                | 26.17     | 0.79           | 2.2            | 1.1            | 3.20          |      |
|          | Sulfometuron methyl | 5.20            | 27.38                | 27.38     | 0.41           | 3.3            | 0.6            | 4.65          |      |
|          | Chlorsulfuron       | 3.60            | 28.22                | 29.73     | 0.49           | 3.4            | 0.5            | 3.45          |      |
|          | Fluometuron         |                 | 31.11                | 30.99     | 0.03           | 0.9            | 0.1            | 3.12          |      |
|          | Diuron              |                 | 34.61                | 34.55     | 0.03           | 0.6            | 0.2            | 4.45          |      |
|          | Bensulfuron methyl  | 5.20            | 36.84                | 36.78     | 0.09           | 1.4            | 0.3            | 5.20          |      |
|          | Siduron             |                 | 37.87                | 37.75     | 0.17           | 1.2            | 0.3            | 2.32          |      |
|          | Metolachlor         |                 | 42.81                | 42.75     | 0.16           | 2.4            | 0.2            | 2.43          |      |
|          | Neburon             |                 | 45.35                | 45.22     | 0.06           | 1.1            | 0.3            | 4.99          |      |
|          | Prochloraz          |                 | 47.94                | 46.91     | 0.41           | 0.4            | 1.1            | 0.97          |      |
|          | Pirimiphos-ethyl    |                 | 52.22                | 51.62     | 0.01           | 0.0            | 0.3            | 0.85          |      |
|          | Carbaryl            |                 | 29.18                | 29.12     | 0.02           | 0.8            | 0.1            | 4.49          |      |
|          | Fenuron             |                 | 13.99                | 13.93     | 0.04           | 0.9            | 0.1            | 2.20          |      |
|          | Rimsulfuron         | 4.00            | 20.50                | 20.44     | 1.09           | 5.3            | 0.9            | 4.59          |      |
|          | Triazines           |                 |                      |           |                |                |                |               |      |
|          | Ametryn             | 4.10            | 35.58                | 32.02     | No             | No             | No             | 1.03          |      |
|          | Atrazine            | 1.70            | 31.72                | 31.60     | No             | No             | No             | 0.99          |      |
|          | Cyanazine           | 0.63            | 24.36                | 24.24     | No             | No             | No             | 1.25          |      |
|          | Prometryn           | 4.10            | 40.52                | 37.14     | No             | No             | No             | 0.95          |      |
|          | Simazine            | 1.62            | 25.57                | 25.51     | No             | No             | No             | 0.90          |      |
|          | Terbutryn           | 4.30            | 41.37                | 37.87     | No             | No             | No             | 1.05          |      |
|          | ESI-                |                 |                      |           |                |                |                | $[M-H]^-$ (A) |      |
|          |                     |                 |                      |           |                |                |                | $[M-H]^-$ (B) |      |
|          |                     | 2, 4-D          | 2.64                 | 29.70     | 33.38          | NA             | NA             | NA            | 0.40 |
|          |                     | 2, 4-DB         | 4.80                 | 43.14     | 43.26          | NA             | NA             | NA            | 0.74 |
|          |                     | Dichlorprop     | 3.00                 | 35.55     | 38.92          | NA             | NA             | NA            | 0.42 |
|          |                     | MCPA            | 3.07                 | 31.81     | 35.18          | NA             | NA             | NA            | 0.44 |
|          |                     | Mecoprop        | 3.78                 | 37.05     | 39.77          | NA             | NA             | NA            | 0.44 |
|          |                     | Bentazone       | 3.30                 | 19.99     | 25.11          | NA             | NA             | NA            | 0.87 |
|          |                     | Fluometuron     |                      | 31.08     | 31.02          | NA             | NA             | NA            | 0.63 |
|          |                     | Diuron          |                      | 34.58     | 34.52          | NA             | NA             | NA            | 0.92 |
|          |                     | Neburon         |                      | 45.32     | 45.25          | NA             | NA             | NA            | 0.89 |
|          |                     | Siduron         |                      | 37.84     | 37.72          | NA             | NA             | NA            | 0.96 |

No - No sodium adduct ions were observed. NA - Not applicable.

Note: Other compounds that are listed in Table S1 but not shown above have similar trends with those from dimethoate to rimsulfuron. Ammonium does not have significant influences on ion signal of protonated daidzein (refer to Fig. 2A).

**Table S3.** Physical properties of aprotic solvents (methanol, acetonitrile, water and ammonia)

| Solvent            | Gas-phase basicity (kJ/mol) | Proton affinity (kJ/mol) | Volatility (Torr) | Surface tension (dyn/cm) | Viscosity (cp) | Autodissociation constant pK <sub>s</sub> | Dielectric constant |
|--------------------|-----------------------------|--------------------------|-------------------|--------------------------|----------------|-------------------------------------------|---------------------|
| CH <sub>3</sub> CN | 756                         | 788                      | 88.8 (25 °C)      | 19.10 (20 °C)            | 0.38 (15 °C)   | 28.5                                      | 37.5 (20 °C)        |
| CH <sub>3</sub> OH | 728                         | 761                      | 125 (25 °C)       | 22.55 (20 °C)            | 0.55 (20 °C)   | 16.7                                      | 32.7 (25 °C)        |
| H <sub>2</sub> O   | 660                         | 697                      |                   | 73 (20 °C)               | 1.002 (20 °C)  |                                           | 78.5 (25 °C)        |
| NH <sub>3</sub>    | 819                         | 854                      |                   |                          |                |                                           |                     |

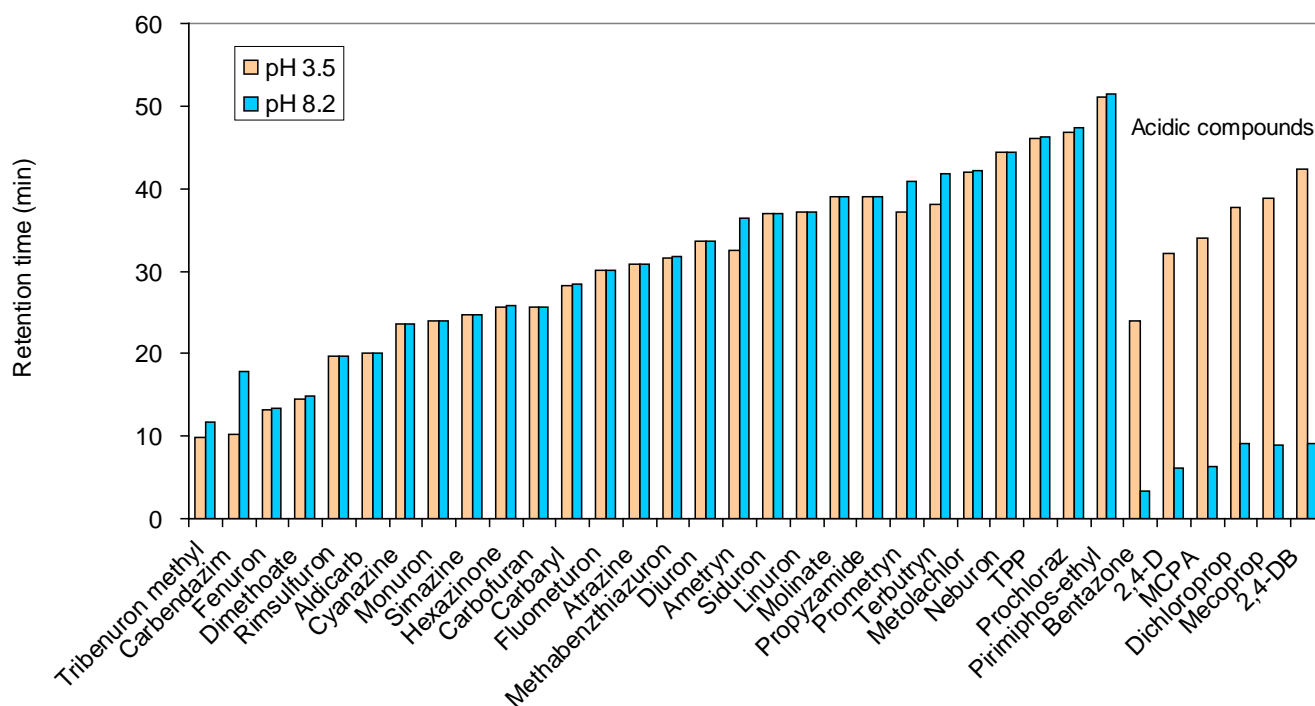

**Fig. S1** Comparison of retention time between formic acid-methanol mobile phase (pH 3.5) and ammonia doped methanol phase (pH 8.2).

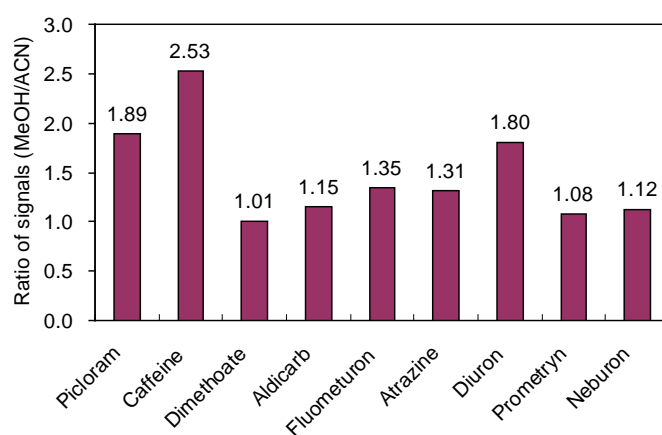

**Fig. S2** The signal ratio of protonated analytes in methanol and acetonitrile solutions. Additive: 1 mM formic acid and 0.4 mM ammonia (pH 3.7)

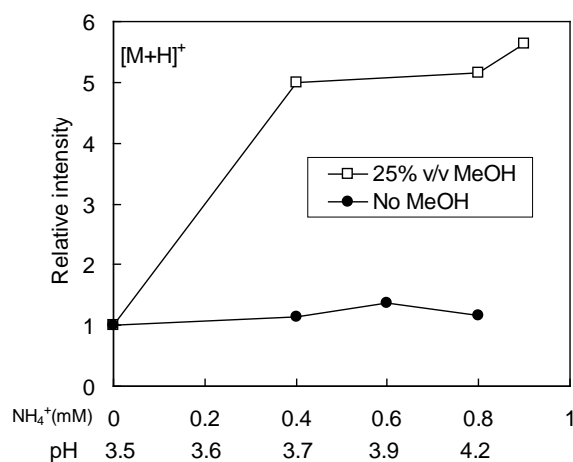

**Fig. S3** Effect of ammonium concentration in formic acid (1 mM)-methanol (25% v/v) solution on the intensity of protonated ion for dimethoate.

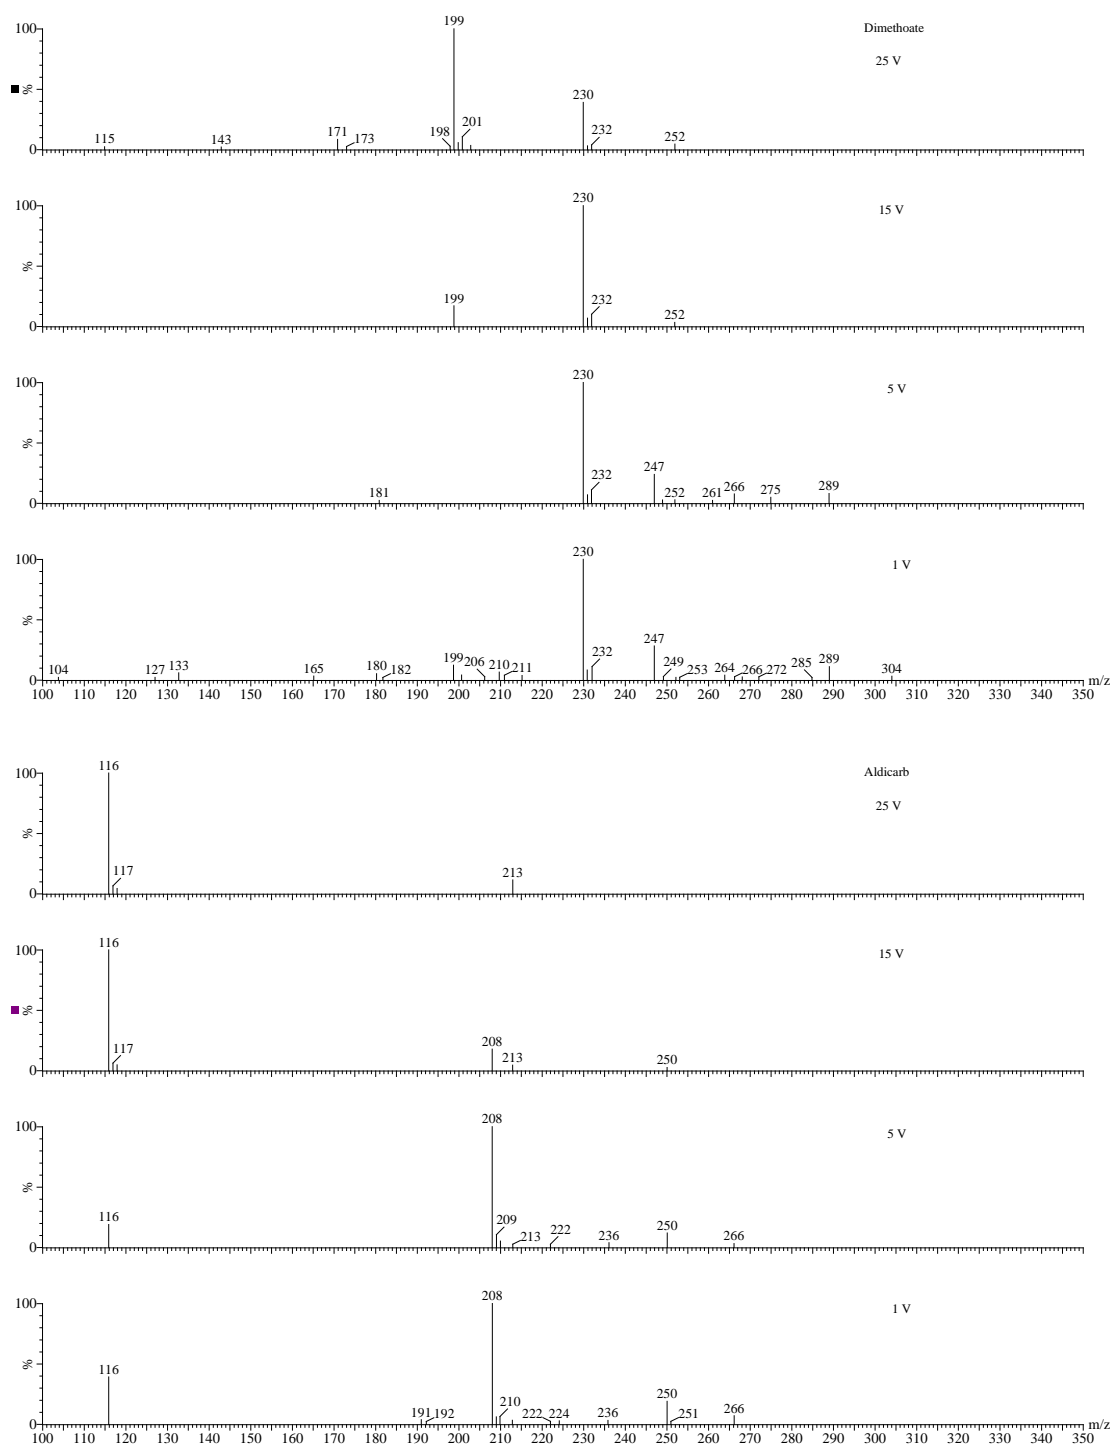

**Fig. S4** Mass spectra of dimethoate and aldicarb under different cone voltages.  $m/z$  247 and 208 are  $[M+NH_4]^+$  for dimethoate and aldicarb, respectively;  $m/z$  252 and 213 are  $[M+Na]^+$  for dimethoate and aldicarb, respectively;  $m/z$  230 is  $[M+H]^+$  for dimethoate;  $m/z$  199 is a fragmented species of dimethoate;  $m/z$  116 is a fragmented species of aldicarb. Mobile phase additive: 1 mM formic acid + 0.4 mM ammonia (pH 3.7).



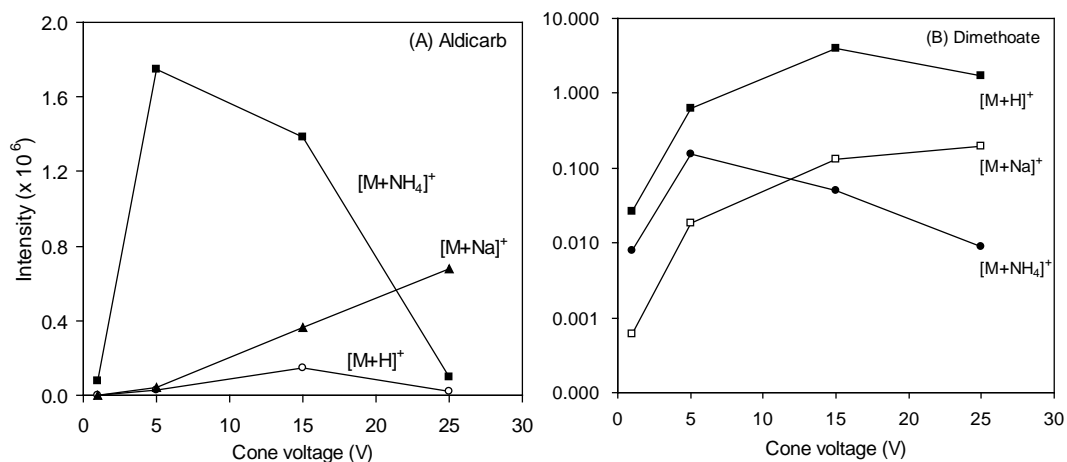

**Fig. S5** Effect of cone voltages on the intensity of ammoniated, sodiated and protonated molecules for (A) Aldicarb and (B) Dimethoate.

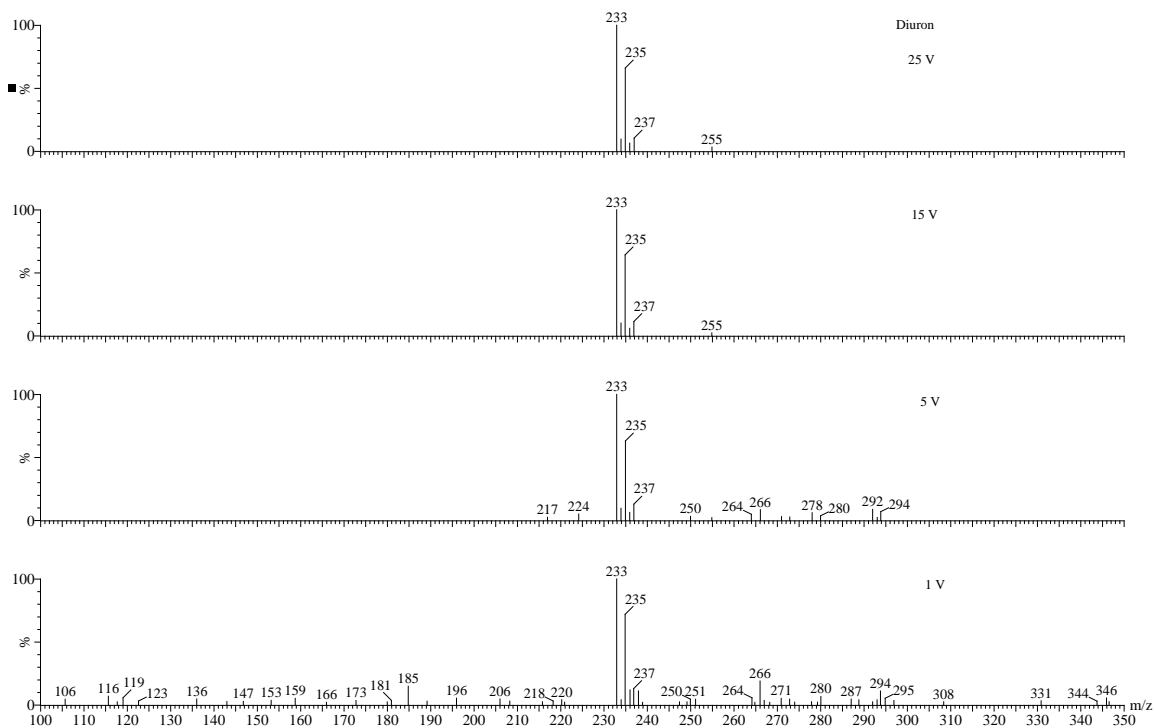

**Fig. S6** Mass spectra of diuron under different cone voltages with 1 mM formic acid-0.4 mM ammonia (pH 3.7) as mobile phase additives. m/z 250 is [M+NH<sub>4</sub>]<sup>+</sup> and m/z 255 is [M+Na]<sup>+</sup>.

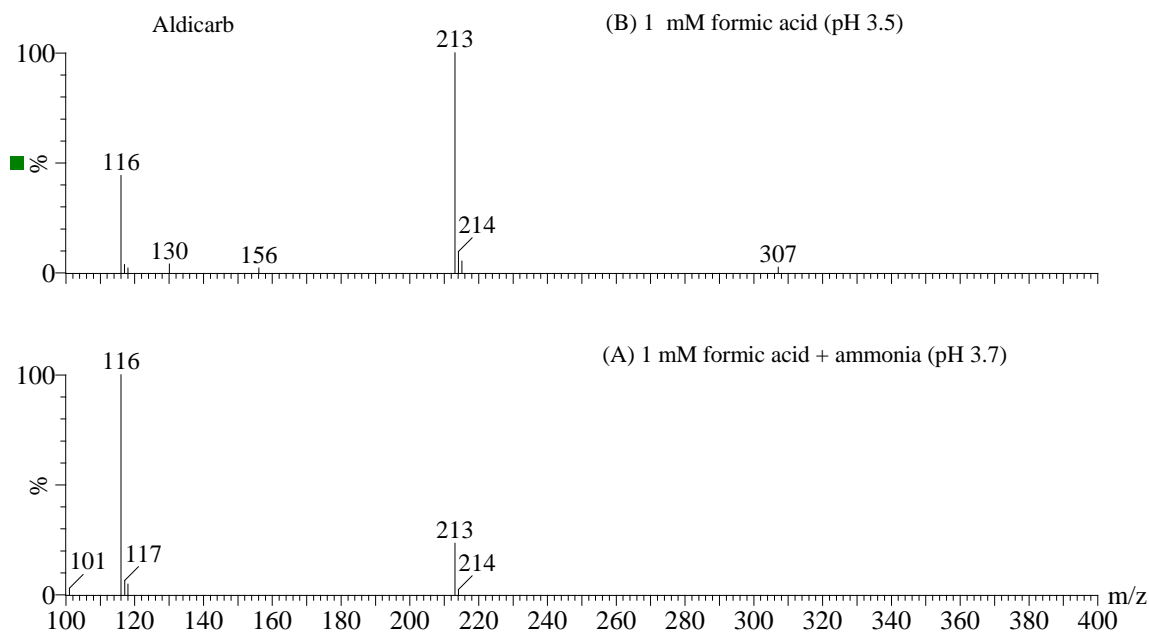

**Fig. S7** Comparison of mass spectra of aldicarb from 1 mM formic acid-methanol solution (pH 3.5) and 1 mM formic acid-0.4 mM ammonia methanol solution (pH 3.7). m/z 213 is Na adduct ion and m/z 116 is a fragmented species of the molecule.
